# Supplementary material for: Methylated Circulating Tumor DNA in Blood as a Tool for Diagnosing Lung Cancer: A Systematic Review and Meta-Analysis
Source: MDPI journal article supplement (doi:10.3390/cancers15153959), 2023-08-03

## Supplementary Materials: Methylated circulating tumor DNA in blood as a tool for diagnosing lung cancer: A systematic review and meta-analysis

Morten Borg <sup>1,#</sup>, Sara Witting Christensen Wen <sup>2,3,#,\*</sup>, Rikke Fredslund Andersen <sup>4</sup>, Signe Timm <sup>2,3</sup>, Torben Frøstrup Hansen <sup>2,3</sup>, and Ole Hilberg <sup>1,3</sup>

<sup>1</sup> Department of Medicine, Vejle Hospital, University Hospital of Southern Denmark; morten.hornemann.borg@rsyd.dk

<sup>2</sup> Department of Oncology, Vejle Hospital, University Hospital of Southern Denmark;  
sara.witting.christensen.wen@rsyd.dk

<sup>3</sup> Department of Regional Health Research, University of Southern Denmark

<sup>4</sup> Department of Biochemistry and Immunology, Vejle Hospital, University Hospital of Southern Denmark

# Contributed equally to the manuscript and share first authorship

\* Correspondence: sara.witting.christensen.wen@rsyd.dk

### Search strings

EMBASE + MEDLINE

#### Block 1: LUNG CANCER

exp lung cancer/

((lung or pulmonary or bronchial or bronchiogenic or bronchogenic or bronchiolo alveolar or bronchial or non small cell or small cell) adj3 (cancer\* or neoplasm\* or maligna\* or carcinoma\* or adenocarcinoma\* or squamous cell carcinoma)) or (schneeberg adj3 disease)

#### Block 2: BLOOD

blood/ or exp arterial blood/ or exp plasma/ or exp serum/

blood or plasma or serum

#### Block 3: CIRCULATING TUMOR DNA

exp circulating tumor DNA/ or exp liquid biopsy/

((tumor or tumour or cell free or circulating or methylat\* or tumor specific or tumour specific) adj3 (dna or gene)) or ctdna or cfdna or liquid biops\*

### Web of Science

#### Block 1: LUNG CANCER

(lung cancer\*) or (lung neoplasm\*) or (lung malignan\*) or (lung carcinoma\*) or (lung adenocarcinoma\*) or (lung squamous cell carcinoma\*) or (pulmonary cancer\*) or (pulmonary neoplasm\*) or (pulmonary malignan\*) or (bronchial carcinoma\*) or (bronchial adenocarcinoma\*) or (bronchial squamous cell carcinoma\*) or (bronchial cancer\*) or (bronchial neoplasm\*) or (bronchial malignan\*) or (bronchial carcinoma\*) or (bronchial adenocarcinoma\*) or (bronchial squamous cell carcinoma\*) or (bronchiogenic cancer\*) or (bronchiogenic neoplasm\*) or (bronchiogenic malignan\*) or (bronchiogenic carcinoma\*) or (bronchiogenic adenocarcinoma\*) or (bronchiogenic squamous cell carcinoma\*) or (bronchogenic cancer\*) or (bronchogenic neoplasm\*) or (bronchogenic malignan\*) or (bronchogenic carcinoma\*) or (bronchogenic adenocarcinoma\*) or (bronchogenic squamous cell carcinoma\*) or (bronchiolo alveolar cancer\*) or (bronchiolo alveolar neoplasm\*) or (bronchiolo alveolar malignan\*) or (bronchiolo alveolar carcinoma\*) or (bronchiolo alveolar adenocarcinoma\*) or (bronchiolo alveolar squamous cell carcinoma\*) or (small cell lung cancer\*) or (small cell lung neoplasm\*) or (small cell lung malignan\*) or (small cell lung carcinoma\*) or (small cell lung adenocarcinoma\*) or (small cell lung squamous cell carcinoma\*) or (non small cell lung

cancer\*) or (non small cell lung neoplasm\*) or (non small cell lung malignan\*) or (non small cell lung carcinoma\*) or (non small cell lung adenocarcinoma\*) or (non small cell lung squamous cell carcinoma\*) or (schneeberg disease)

Block 2: BLOOD

blood or plasma or serum

Block 3: CIRCULATING TUMOR DNA

(tumor DNA) or (tumour DNA) or (cell free DNA) or (circulating DNA) or (methylat\* DNA) or (tumor specific DNA) or (tumour specific DNA) or ctDNA or cfDNA or (liquid biops\*)

Cochrane Library

Block 1: LUNG CANCER

MeSH: lung neoplasms

("lung cancer") or ("lung neoplasm") or ("lung malignancy") or ("lung carcinoma") or ("lung adenocarcinoma") or ("lung squamous cell carcinoma") or ("pulmonary cancer") or ("pulmonary neoplasm") or ("pulmonary malignancy") or ("bronchial carcinoma") or ("bronchial adenocarcinoma") or ("bronchial squamous cell carcinoma") or ("bronchial cancer") or ("bronchial neoplasm") or ("bronchial malignancy") or ("bronchial carcinoma") or ("bronchial adenocarcinoma") or ("bronchial squamous cell carcinoma") or ("bronchiogenic cancer") or ("bronchiogenic neoplasm") or ("bronchiogenic malignancy") or ("bronchiogenic carcinoma") or ("bronchiogenic adenocarcinoma") or ("bronchiogenic squamous cell carcinoma") or ("bronchogenic cancer") or ("bronchogenic neoplasm") or ("bronchogenic malignancy") or ("bronchogenic carcinoma") or ("bronchogenic adenocarcinoma") or ("bronchogenic squamous cell carcinoma") or ("bronchiolo alveolar cancer") or ("bronchiolo alveolar neoplasm") or ("bronchiolo alveolar malignancy") or ("bronchiolo alveolar carcinoma") or ("bronchiolo alveolar adenocarcinoma") or ("bronchiolo alveolar squamous cell carcinoma") or ("small cell lung cancer") or ("small cell lung neoplasm") or ("small cell lung malignancy") or ("small cell lung carcinoma") or ("small cell lung adenocarcinoma") or ("small cell lung squamous cell carcinoma") or ("non small cell lung cancer") or ("non small cell lung neoplasm") or ("non small cell lung malignancy") or ("non small cell lung carcinoma") or ("non small cell lung adenocarcinoma") or ("non small cell lung squamous cell carcinoma") or ("schneeberg disease")

Block 2: BLOOD

MeSH: blood or plasma or serum

blood or plasma or serum

Block 3: CIRCULATING TUMOR DNA

MeSH: circulating tumor DNA or liquid biopsy

("circulating tumor DNA") or ("circulating tumour DNA") or ("cell free DNA") or ("circulating tumor DNA") or ("methylated tumor DNA") or ("tumor specific DNA") or ("tumour specific DNA") or ctDNA or cfDNA or ("liquid biopsy" or "liquid biopsies")

*Reviewer agreement*

There was good agreement between the reviewers with a proportionate agreement of 0.92 and Cohen's Kappa of 0.74.

Table S1: Comprehensive list of genes

|                 |
|-----------------|
| AIM1            |
| CDKN2A          |
| CDO1            |
| DCC             |
| DCLK1           |
| DICER region 1  |
| DLEC1           |
| DROSHA region 1 |
| DROSHA region 2 |
| GATA4           |
| GATA5           |
| HOXA7           |
| HOXA9           |
| KIF1a           |
| KLK10           |
| KMT2C           |
| LINE-1          |
| MGMT            |
| NISCH           |
| p16             |
| PAX5            |
| PCDHGB6         |
| PITX2           |
| PTGDR           |
| PTGER4          |
| RARBeta         |
| RASSF1A         |
| RTKL1           |
| SEPT9           |
| SERPINA1        |
| SFRP1           |
| SHOX2           |
| SHP1P2          |
| SLIT2           |
| SOX17           |
| TAC1            |
| TMPRSS4         |
| UNCX            |
| WT1             |
| ZFP42           |

Table S2: Contingency tables for all included studies

| Study ID    | Gene name        | Test positive<br>Lung cancer<br>positive | Test<br>positive<br>Lung cancer<br>negative | Test<br>negative<br>Lung cancer<br>positive | Test negative<br>Lung cancer<br>negative |
|-------------|------------------|------------------------------------------|---------------------------------------------|---------------------------------------------|------------------------------------------|
| Zeng 2022   | SHOX2            | 74                                       | 4                                           | 47                                          | 117                                      |
| Ostrow 2009 | KIf1a evaluation | 3                                        | 1                                           | 8                                           | 23                                       |

|                       |                        |     |    |    |     |
|-----------------------|------------------------|-----|----|----|-----|
| Ostrow 2009           | NISCH evaluation       | 4   | 2  | 7  | 22  |
| Ostrow 2009           | RarB evaluation        | 5   | 1  | 8  | 23  |
| Ostrow 2009           | DCC evaluation         | 6   | 0  | 5  | 11  |
| Ostrow 2009           | B4GALT1 evaluation     | 1   | 2  | 8  | 8   |
| Ostrow 2009           | KIF1A validation       | 13  | 1  | 57 | 79  |
| Ostrow 2009           | DCC validation         | 19  | 4  | 51 | 76  |
| Ostrow 2009           | RARB validation        | 11  | 3  | 59 | 77  |
| Ostrow 2009           | NISCH validation       | 29  | 20 | 41 | 60  |
| Park 2021             | LINE-1                 | 48  | 8  | 16 | 56  |
| Aslam 2017            | DCC                    | 19  | 0  | 15 | 34  |
| Usadel 2002           | APC serum/plasma       | 42  | 0  | 47 | 50  |
| Usadel 2002           | APC plasma             | 14  | 0  | 1  | 50  |
| Zhang 2010 A          | KLK10                  | 30  | 2  | 48 | 48  |
| Zhang 2010 B          | SFRP1                  | 22  | 2  | 56 | 48  |
| Begum 2011            | APC training           | 9   | 2  | 16 | 28  |
| Begum 2011            | APC validation         | 12  | 3  | 64 | 27  |
| Begum 2011            | AIM1 training          | 4   | 1  | 13 | 14  |
| Begum 2011            | AIM1 validation        | 14  | 1  | 62 | 29  |
| Begum 2011            | CDH1 training          | 10  | 1  | 7  | 14  |
| Begum 2011            | CDH1 validation        | 47  | 9  | 29 | 21  |
| Begum 2011            | DCC training           | 3   | 0  | 14 | 136 |
| Begum 2011            | DCC validation         | 27  | 0  | 49 | 30  |
| Begum 2011            | MGMT training          | 5   | 1  | 20 | 29  |
| Begum 2011            | MGMT validation        | 13  | 1  | 63 | 29  |
| Begum 2011            | RASSF1A training       | 2   | 1  | 23 | 29  |
| Begum 2011            | RASSF1A validation     | 6   | 1  | 70 | 29  |
| Kneip 2011            | SHOX2 training         | 15  | 1  | 5  | 19  |
| Kneip 2011            | SHOX2 test             | 112 | 16 | 76 | 139 |
| Ponomaryova 2011      | RARB2                  | 33  | 13 | 19 | 13  |
| Vinayanuwattikun 2011 | SHP1P2                 | 34  | 5  | 4  | 47  |
| Gao 2015              | RASSF1A plasma benign  | 25  | 2  | 33 | 29  |
| Gao 2015              | RASSF1A plasma healthy |     | 0  |    | 23  |
| Gao 2015              | RASSF1A serum          | 21  |    | 19 | 12  |
| Gao 2015              | APC plasma benign      | 14  | 1  | 44 | 30  |
| Gao 2015              | APC plasma healthy     |     | 0  |    | 23  |
| Gao 2015              | APC serum              | 17  | 2  | 23 | 11  |
| Powrozek 2014         | SEPT9                  | 31  | 4  | 39 | 96  |
| Balgkouranidou 2014 A | BRMS1 training         | 23  | 0  | 25 | 24  |
| Balgkouranidou 2014 A | BRMS1 validation       | 47  | 0  | 27 | 24  |
| Powrozek 2016         | DCLK1                  | 32  | 8  | 33 | 87  |
| Balgkouranidou 2016 B | SOX17 training         | 27  | 1  | 21 | 48  |

|                       |                      |     |    |     |     |
|-----------------------|----------------------|-----|----|-----|-----|
| Balgkouranidou 2016 B | SOX17 validation     | 27  | 1  | 47  | 48  |
| Powrozek 2016         | PCDHGB6              | 29  | 1  | 41  | 79  |
| Powrozek 2016         | RTEL1                | 36  | 7  | 34  | 73  |
| Nunes 2019            | APC                  | 32  | 1  | 97  | 27  |
| Nunes 2019            | RASSF1A              | 31  | 1  | 98  | 27  |
| Villalba 2019         | TMPRSS4 early (n=16) | 14  | 9  | 2   | 16  |
| Hulbert 2017          | SOX17                | 91  | 8  | 34  | 42  |
| Hulbert 2017          | TAC1                 | 95  | 11 | 30  | 39  |
| Hulbert 2017          | HOXA7                | 42  | 4  | 83  | 46  |
| Hulbert 2017          | CD01                 | 81  | 13 | 44  | 37  |
| Hulbert 2017          | HOXA9                | 108 | 27 | 17  | 23  |
| Hulbert 2017          | ZFP42                | 105 | 23 | 20  | 27  |
| Ooki 2017             | HOXA9                | 12  | 3  | 31  | 39  |
| Ooki 2017             | MARCH11              | 15  | 6  | 28  | 36  |
| Ooki 2017             | CDO1                 | 7   | 2  | 36  | 40  |
| Ooki 2017             | PTGDR                | 4   | 2  | 39  | 40  |
| Ooki 2017             | UNCX                 | 3   | 0  | 40  | 42  |
| Ooki 2017             | AJAP1                | 2   | 0  | 41  | 42  |
| Yang 2019             | CDH13                | 12  | 1  | 27  | 10  |
| Yang 2019             | WT1                  | 12  | 0  | 27  | 11  |
| Yang 2019             | CDKN2A               | 11  | 0  | 28  | 11  |
| Yang 2019             | HOXA9                | 8   | 0  | 31  | 11  |
| Yang 2019             | PITX2                | 11  | 0  | 28  | 11  |
| Yang 2019             | CALCA                | 20  | 0  | 19  | 11  |
| Yang 2019             | RASSF1A              | 16  | 0  | 23  | 11  |
| Yang 2019             | DLEC1                | 16  | 0  | 23  | 11  |
| Li 2020               | p16                  | 44  | 19 | 4   | 32  |
| Li 2020               | MGMT                 | 45  | 34 | 3   | 17  |
| Li 2020               | RASSF1               | 44  | 16 | 4   | 35  |
| Chen 2020             | CDO1                 | 106 | 17 | 57  | 66  |
| Chen 2020             | TAC1                 | 110 | 26 | 53  | 57  |
| Chen 2020             | SOX17                | 113 | 15 | 50  | 68  |
| Chen 2020             | HOXA7                | 98  | 15 | 65  | 68  |
| Chen 2020             | HOXA9                | 101 | 42 | 62  | 41  |
| Chen 2020             | GATA4                | 68  | 35 | 95  | 48  |
| Chen 2020             | GATA5                | 72  | 38 | 91  | 45  |
| Chen 2020             | PAX5                 | 67  | 37 | 96  | 46  |
| Xu 2020               | SHOX2                | 198 | 15 | 104 | 138 |
| Xu 2020               | PTGER4               | 170 | 15 | 132 | 138 |
| Huang 2020            | SHOX2 training       | 63  | 1  | 41  | 35  |
| Huang 2020            | PTGER4 training      | 56  | 1  | 48  | 35  |
| Huang 2020            | SHOX2 validation     | 12  | 1  | 7   | 10  |
| Huang 2020            | PTGER4 validation    | 10  | 3  | 9   | 9   |
| Mastoraki 2021        | KMT2C operable NSCLC | 7   | 0  | 41  | 60  |
| Mastoraki 2021        | KMT2C stage IV NSCLC | 18  | 0  | 73  | 60  |

|                        |                            |    |    |    |    |
|------------------------|----------------------------|----|----|----|----|
| Wen 2020               | HOXA9                      | 36 | 2  | 12 | 98 |
| Szczyrek 2021          | DROSHA region 1            | 72 | 11 | 29 | 34 |
| Szczyrek 2021          | DROSHA region 2            | 61 | 7  | 40 | 38 |
| Szczyrek 2021          | DICER region 1             | 97 | 18 | 4  | 27 |
| Kim 2022               | SLIT2                      | 53 | 23 | 19 | 38 |
| Vo 2022                | SHOX2                      | 25 | 2  | 5  | 25 |
| Palanca-Ballester 2022 | BCAT1                      | 32 | 4  | 12 | 35 |
| Zhang 2022             | SERPINA1 (COPD+LC vs COPD) | 12 | 12 | 11 | 44 |

Table S3: Quality assessment QUADAS-2 – Patient selection

| Study ID              | Was a consecutive or random sample of patients enrolled? | Was a case-control design avoided? | Did the study avoid inappropriate exclusions? | Could the selection of patients have introduced bias? | Is there concern that the included patients do not match the review question? |
|-----------------------|----------------------------------------------------------|------------------------------------|-----------------------------------------------|-------------------------------------------------------|-------------------------------------------------------------------------------|
| Zeng 2022             | No                                                       | No                                 | Yes                                           | Unclear                                               | Low risk                                                                      |
| Ostrow 2009           | No                                                       | No                                 | Yes                                           | Unclear                                               | Low risk                                                                      |
| Park 2021             | No                                                       | No                                 | Yes                                           | Unclear                                               | Low risk                                                                      |
| Aslam 2017            | Unclear                                                  | No                                 | Yes                                           | Unclear                                               | Low risk                                                                      |
| Usadel 2002           | No                                                       | No                                 | Yes                                           | Unclear                                               | Low risk                                                                      |
| Zhang 2010 A          | No                                                       | No                                 | Yes                                           | Unclear                                               | Low risk                                                                      |
| Zhang 2010 B          | No                                                       | No                                 | Yes                                           | Unclear                                               | Low risk                                                                      |
| Begum 2011            | Yes                                                      | No                                 | Yes                                           | Low risk                                              | Low risk                                                                      |
| Kneip 2011            | No                                                       | No                                 | Yes                                           | High risk                                             | High risk <sup>1</sup>                                                        |
| Ponomaryova 2011      | No                                                       | No                                 | Yes                                           | Unclear                                               | High risk <sup>2</sup>                                                        |
| Vinayanuwattikun 2011 | No                                                       | No                                 | Unclear                                       | High risk                                             | Unclear                                                                       |
| Gao 2015              | Unclear                                                  | Yes                                | Yes                                           | Low risk                                              | Low risk                                                                      |
| Powrozek 2014         | No                                                       | No                                 | Yes                                           | Unclear                                               | Low risk                                                                      |
| Balgkouranidou 2014 A | No                                                       | No                                 | Yes                                           | High risk                                             | Low risk                                                                      |
| Powrozek 2016         | No                                                       | No                                 | Yes                                           | Unclear                                               | Low risk                                                                      |
| Balgkouranidou 2016 B | No                                                       | No                                 | Yes                                           | High risk                                             | Low risk                                                                      |
| Powrozek 2016         | No                                                       | No                                 | Yes                                           | Unclear                                               | Low risk                                                                      |
| Nunes 2019            | No                                                       | No                                 | Yes                                           | Unclear                                               | Low risk                                                                      |
| Villalba 2019         | No                                                       | No                                 | Yes                                           | Unclear                                               | Low risk                                                                      |
| Hulbert 2017          | Unclear                                                  | Yes                                | Yes                                           | Low risk                                              | Low risk                                                                      |
| Ooki 2017             | No                                                       | No                                 | Yes                                           | Unclear                                               | Low risk                                                                      |
| Yang 2019             | No                                                       | Yes                                | Yes                                           | Low risk                                              | Low risk                                                                      |
| Li 2020               | No                                                       | No                                 | Yes                                           | Unclear                                               | Low risk                                                                      |
| Chen 2020             | Unclear                                                  | Yes                                | Yes                                           | Low risk                                              | Low risk                                                                      |
| Xu 2020               | No                                                       | No                                 | Yes                                           | Unclear                                               | Low risk                                                                      |
| Huang 2020            | Yes                                                      | No                                 | Yes                                           | Low risk                                              | Low risk                                                                      |
| Mastoraki 2021        | No                                                       | No                                 | Yes                                           | Low risk                                              | Low risk                                                                      |

|                        |         |    |     |           |                        |
|------------------------|---------|----|-----|-----------|------------------------|
| Wen 2020               | No      | No | Yes | High risk | High risk <sup>3</sup> |
| Szczyrek 2021          | Yes     | No | Yes | Low risk  | Low risk               |
| Kim 2022               | Unclear | No | Yes | Unclear   | Low risk               |
| Vo 2022                | No      | No | Yes | Unclear   | Low risk               |
| Palanca-Ballester 2022 | No      | No | Yes | Unclear   | Low risk               |
| Zhang 2022             | Yes     | No | Yes | Low risk  | Low risk               |

Patient selection: Is there concern that the included patients do not match the review question? Supporting text:

1: Because there are many cases and controls with missing data. Half of the cases and controls have no reported age, 20-25% have no reported gender, 55% of cases have other or unknown lung cancer histology, and 4 controls have prostate cancer.

2: Because the control group consisted entirely of males.

3: Only adenocarcinoma patients.

Table S4: Quality assessment QUADAS-2 – Index test

| Study ID              | Were the index test results interpreted without knowledge of the results of the reference standard? | If a threshold was used, was it pre-specified? | Could the conduct or interpretation of the index test have introduced bias? | Is there concern that the index test, its conduct, or interpretation differ from the review question? |
|-----------------------|-----------------------------------------------------------------------------------------------------|------------------------------------------------|-----------------------------------------------------------------------------|-------------------------------------------------------------------------------------------------------|
| Zeng 2022             | Unclear                                                                                             | No                                             | Unclear                                                                     | Low risk                                                                                              |
| Ostrow 2009           | Unclear                                                                                             | Yes                                            | Low risk                                                                    | Low risk                                                                                              |
| Park 2021             | Yes                                                                                                 | No                                             | Low risk                                                                    | Low risk                                                                                              |
| Aslam 2017            | Unclear                                                                                             | Unclear                                        | Unclear                                                                     | Low risk                                                                                              |
| Usadel 2002           | Unclear                                                                                             | Unclear                                        | Unclear                                                                     | Low risk                                                                                              |
| Zhang 2010 A          | Unclear                                                                                             | Unclear                                        | Unclear                                                                     | Low risk                                                                                              |
| Zhang 2010 B          | Unclear                                                                                             | Unclear                                        | Unclear                                                                     | Low risk                                                                                              |
| Begum 2011            | Unclear                                                                                             | Yes                                            | Low risk                                                                    | Low risk                                                                                              |
| Kneip 2011            | Unclear                                                                                             | No                                             | Unclear                                                                     | Low risk                                                                                              |
| Ponomaryova 2011      | Unclear                                                                                             | No                                             | Unclear                                                                     | Low risk                                                                                              |
| Vinayanuwattikun 2011 | Unclear                                                                                             | No <sup>2</sup>                                | Unclear                                                                     | High risk                                                                                             |
| Gao 2015              | Unclear                                                                                             | Unclear                                        | Unclear                                                                     | Low risk                                                                                              |
| Powrozek 2014         | Unclear                                                                                             | Yes                                            | Low risk                                                                    | Low risk                                                                                              |
| Balgkouranidou 2014 A | No                                                                                                  | Unclear                                        | Low risk                                                                    | Low risk                                                                                              |
| Powrozek 2016         | Unclear                                                                                             | Unclear                                        | Unclear                                                                     | Low risk                                                                                              |
| Balgkouranidou 2016 B | No                                                                                                  | Unclear                                        | Low risk                                                                    | Low risk                                                                                              |
| Powrozek 2016         | Unclear                                                                                             | No                                             | Unclear                                                                     | Low risk                                                                                              |
| Nunes 2019            | Unclear                                                                                             | Yes                                            | Low risk                                                                    | Low risk                                                                                              |
| Villalba 2019         | Unclear                                                                                             | No                                             | Unclear                                                                     | Low risk                                                                                              |
| Hulbert 2017          | Unclear                                                                                             | No                                             | Unclear                                                                     | Low risk                                                                                              |
| Ooki 2017             | Unclear                                                                                             | Yes                                            | Low risk                                                                    | Low risk                                                                                              |

|                        |         |                 |          |          |
|------------------------|---------|-----------------|----------|----------|
| Yang 2019              | Unclear | No              | Low risk | Low risk |
| Li 2020                | Unclear | No <sup>3</sup> | Unclear  | Low risk |
| Chen 2020              | Unclear | No              | Unclear  | Low risk |
| Xu 2020                | Yes     | Yes             | Low risk | Low risk |
| Huang 2020             | Unclear | Yes             | Low risk | Low risk |
| Mastoraki 2021         | Unclear | Yes             | Low risk | Low risk |
| Wen 2020               | Unclear | Yes             | Low risk | Low risk |
| Szczyrek 2021          | Unclear | Unclear         | Unclear  | Low risk |
| Kim 2022               | Unclear | Yes             | Low risk | Low risk |
| Vo 2022                | Unclear | No <sup>4</sup> | Unclear  | Low risk |
| Palanca-Ballester 2022 | Unclear | No              | Unclear  | Low risk |
| Zhang 2022             | Unclear | Unclear         | Unclear  | Low risk |

If a threshold was used, was it pre-specified? Supporting text:

1: Not quantitative but verified by sequencing.

2: Only ROC analysis of the cohort in the study.

3: Cutoff set in the present study.

4: Only training cohort, no validation cohort.

Table S5: Quality assessment QUADAS-2 – Reference standard

| Study ID              | Is the reference standard likely to correctly classify the target condition? | Were the reference standard results interpreted without knowledge of the results of the index test? | Could the reference standard, its conduct, or its interpretation have introduced bias? | Is there concern that the target condition as defined by the reference standard does not match the review question? |
|-----------------------|------------------------------------------------------------------------------|-----------------------------------------------------------------------------------------------------|----------------------------------------------------------------------------------------|---------------------------------------------------------------------------------------------------------------------|
| Zeng 2022             | Yes                                                                          | Yes                                                                                                 | Low risk                                                                               | Low risk                                                                                                            |
| Ostrow 2009           | Yes                                                                          | Yes                                                                                                 | Low risk                                                                               | Low risk                                                                                                            |
| Park 2021             | Yes                                                                          | Yes                                                                                                 | Low risk                                                                               | Low risk                                                                                                            |
| Aslam 2017            | Yes                                                                          | Yes                                                                                                 | Low risk                                                                               | Low risk                                                                                                            |
| Usadel 2002           | Yes                                                                          | Yes                                                                                                 | Low risk                                                                               | Low risk                                                                                                            |
| Zhang 2010 A          | Yes                                                                          | Yes                                                                                                 | Low risk                                                                               | Low risk                                                                                                            |
| Zhang 2010 B          | Yes                                                                          | Yes                                                                                                 | Low risk                                                                               | Low risk                                                                                                            |
| Begum 2011            | Yes                                                                          | Yes                                                                                                 | Low risk                                                                               | Low risk                                                                                                            |
| Kneip 2011            | Unclear <sup>1</sup>                                                         | Yes                                                                                                 | Unclear                                                                                | Unclear                                                                                                             |
| Ponomaryova 2011      | Yes                                                                          | Yes                                                                                                 | Low risk                                                                               | Low risk                                                                                                            |
| Vinayanuwattikun 2011 | Yes                                                                          | Yes                                                                                                 | Low risk                                                                               | Low risk                                                                                                            |
| Gao 2015              | Yes                                                                          | Yes                                                                                                 | Low risk                                                                               | Low risk                                                                                                            |
| Powrozek 2014         | Yes                                                                          | Yes                                                                                                 | Low risk                                                                               | Low risk                                                                                                            |
| Balgkouranidou 2014 A | Yes                                                                          | Yes                                                                                                 | Low risk                                                                               | Low risk                                                                                                            |
| Powrozek 2016         | Yes                                                                          | Yes                                                                                                 | Low risk                                                                               | Low risk                                                                                                            |
| Balgkouranidou 2016 B | Yes                                                                          | Yes                                                                                                 | Low risk                                                                               | Low risk                                                                                                            |



|                        |     |     |          |          |
|------------------------|-----|-----|----------|----------|
| Powrozek 2016          | Yes | Yes | Low risk | Low risk |
| Nunes 2019             | Yes | Yes | Low risk | Low risk |
| Villalba 2019          | Yes | Yes | Low risk | Low risk |
| Hulbert 2017           | Yes | Yes | Low risk | Low risk |
| Ooki 2017              | Yes | Yes | Low risk | Low risk |
| Yang 2019              | Yes | Yes | Low risk | Low risk |
| Li 2020                | Yes | Yes | Low risk | Low risk |
| Chen 2020              | Yes | Yes | Low risk | Low risk |
| Xu 2020                | Yes | Yes | Low risk | Low risk |
| Huang 2020             | Yes | Yes | Low risk | Low risk |
| Mastoraki 2021         | Yes | Yes | Low risk | Low risk |
| Wen 2020               | Yes | Yes | Low risk | Low risk |
| Szczyrek 2021          | Yes | Yes | Low risk | Low risk |
| Kim 2022               | Yes | Yes | Low risk | Low risk |
| Vo 2022                | Yes | Yes | Low risk | Low risk |
| Palanca-Ballester 2022 | Yes | Yes | Low risk | Low risk |
| Zhang 2022             | Yes | Yes | Low risk | Low risk |

Is the reference standard likely to correctly classify the target condition? Supporting text:

1: The choice of reference standard was not described.

Table S6: Quality assessment QUADAS-2 – Flow and timing

| Study ID              | Was there an appropriate interval between index test and reference standard? | Did all patients receive a reference standard? | Did patients receive the same reference standard? | Were all patients included in the analysis? | Could the patient flow have introduced bias? |
|-----------------------|------------------------------------------------------------------------------|------------------------------------------------|---------------------------------------------------|---------------------------------------------|----------------------------------------------|
| Zeng 2022             | Yes                                                                          | Yes                                            | Yes                                               | Yes                                         | Low risk                                     |
| Ostrow 2009           | Unclear                                                                      | Yes                                            | Yes                                               | Yes                                         | Low risk                                     |
| Park 2021             | Unclear                                                                      | Yes                                            | Yes                                               | Yes                                         | Unclear                                      |
| Aslam 2017            | Unclear                                                                      | Yes                                            | Yes                                               | Yes                                         | Low risk                                     |
| Usadel 2002           | Yes                                                                          | Yes                                            | Yes                                               | Yes                                         | Low risk                                     |
| Zhang 2010 A          | Yes                                                                          | Yes                                            | Yes                                               | Yes                                         | Low risk                                     |
| Zhang 2010 B          | Yes                                                                          | Yes                                            | Yes                                               | Yes                                         | Low risk                                     |
| Begum 2011            | Unclear                                                                      | Yes                                            | Yes                                               | Yes                                         | Low risk                                     |
| Kneip 2011            | Unclear                                                                      | Unclear                                        | Unclear                                           | No                                          | Unclear                                      |
| Ponomaryova 2011      | Unclear                                                                      | Yes                                            | Yes                                               | Yes                                         | Low risk                                     |
| Vinayanuwattikun 2011 | Unclear                                                                      | Yes                                            | Yes                                               | Yes                                         | Unclear                                      |
| Gao 2015              | Unclear                                                                      | Yes                                            | Yes                                               | Yes                                         | Low risk                                     |
| Powrozek 2014         | Unclear                                                                      | Yes                                            | Yes                                               | Yes                                         | Low risk                                     |
| Balgkouranidou 2014 A | Unclear                                                                      | Yes                                            | No <sup>3</sup>                                   | Yes                                         | Low risk                                     |
| Powrozek 2016         | Yes                                                                          | Yes                                            | Yes                                               | Yes                                         | Low risk                                     |
| Balgkouranidou 2016 B | Unclear                                                                      | Yes                                            | No                                                | Yes                                         | Low risk                                     |

|                        |                 |     |         |         |           |
|------------------------|-----------------|-----|---------|---------|-----------|
| Powrozek 2016          | Yes             | Yes | Yes     | Yes     | Low risk  |
| Nunes 2019             | Yes             | Yes | Yes     | Yes     | Low risk  |
| Villalba 2019          | Unclear         | Yes | Yes     | Yes     | Unclear   |
| Hulbert 2017           | No <sup>1</sup> | Yes | Yes     | No      | Low risk  |
| Ooki 2017              | Unclear         | Yes | Yes     | Unclear | Unclear   |
| Yang 2019              | Yes             | Yes | Yes     | Yes     | Low risk  |
| Li 2020                | Unclear         | Yes | Yes     | Yes     | Low risk  |
| Chen 2020              | Yes             | Yes | Yes     | Yes     | Low risk  |
| Xu 2020                | Unclear         | Yes | Yes     | Yes     | Low risk  |
| Huang 2020             | Yes             | Yes | Yes     | Yes     | Low risk  |
| Mastoraki 2021         | No <sup>2</sup> | Yes | Yes     | Yes     | Low risk  |
| Wen 2020               | Unclear         | Yes | Yes     | Yes     | Low risk  |
| Szczyrek 2021          | Unclear         | Yes | Yes     | Yes     | Low risk  |
| Kim 2022               | No              | Yes | Unclear | No      | High risk |
| Vo 2022                | Yes             | Yes | Yes     | Yes     | Unclear   |
| Palanca-Ballester 2022 | Unclear         | Yes | Yes     | Yes     | Low risk  |
| Zhang 2022             | Yes             | Yes | Yes     | Yes     | Low risk  |

Was there an appropriate interval between index test(s) and reference standard? Supporting text:

1: Too long time plasma storage.

2: Too long. Samples were collected in 2004-2006. Not stated when they were analyzed, but study published in 2021.

Did patients receive the same reference standard? Supporting text:

3: Some had surgery to confirm the diagnosis, others had biopsies.

Table S7: Quality assessment – Funding and conflicts of interest

| Study ID              | Funding: How was the study funded? | Conflicts of interest                          |
|-----------------------|------------------------------------|------------------------------------------------|
| Zeng 2022             | Public/non-profit funding sources  | None                                           |
| Ostrow 2009           | Company/corporate funding sources  | Yes, pertaining to the funding sources         |
| Park 2021             | Public/non-profit funding sources  | None                                           |
| Aslam 2017            | Public/non-profit funding sources  | None                                           |
| Usadel 2002           | Public/non-profit funding sources  | Yes, but not pertaining to the funding sources |
| Zhang 2010 A          | Unclear                            | Not stated                                     |
| Zhang 2010 B          | Unclear                            | Not stated                                     |
| Begum 2011            | Company/corporate funding sources  | Yes, pertaining to the funding sources         |
| Kneip 2011            | Unclear                            | Yes, pertaining to the funding sources         |
| Ponomaryova 2011      | Public/non-profit funding sources  | None                                           |
| Vinayanuwattikun 2011 | Public/non-profit funding sources  | None                                           |
| Gao 2015              | Public/non-profit funding sources  | None                                           |
| Powrozek 2014         | Unclear                            | None                                           |
| Balgkouranidou 2014 A | Public/non-profit funding sources  | Not stated                                     |
| Powrozek 2016         | Company/corporate funding sources  | None                                           |

|                        |                                   |                                                |
|------------------------|-----------------------------------|------------------------------------------------|
| Balgkouranidou 2016 B  | Public/non-profit funding sources | None                                           |
| Powrozek 2016          | Company/corporate funding sources | None                                           |
| Nunes 2019             | Public/non-profit funding sources | None                                           |
| Villalba 2019          | Public/non-profit funding sources | None                                           |
| Hulbert 2017           | Public/non-profit funding sources | Yes, but not pertaining to the funding sources |
| Ooki 2017              | Public/non-profit funding sources | None                                           |
| Yang 2019              | Public/non-profit funding sources | None                                           |
| Li 2020                | Public/non-profit funding sources | None                                           |
| Chen 2020              | Public/non-profit funding sources | None                                           |
| Xu 2020                | Public/non-profit funding sources | None                                           |
| Huang 2020             | Public/non-profit funding sources | None                                           |
| Mastoraki 2021         | Public/non-profit funding sources | None                                           |
| Wen 2020               | Public/non-profit funding sources | Yes, but not pertaining to the funding sources |
| Szczyrek 2021          | Public/non-profit funding sources | None                                           |
| Kim 2022               | Public/non-profit funding sources | None                                           |
| Vo 2022                | Public/non-profit funding sources | None                                           |
| Palanca-Ballester 2022 | Public/non-profit funding sources | None                                           |
| Zhang 2022             | Public/non-profit funding sources | None                                           |

#### *Risk of publication bias*

Suspicion of publication bias can arise when a higher proportion of small studies report bigger effect sizes compared to larger studies. The risk of publication bias in the current review was visualized by Deek's Funnel Plot (Figure S1). The asymmetry test showed no statistically significant publication bias ( $p=0.30$ ).

Figure S1: Funnel Plot

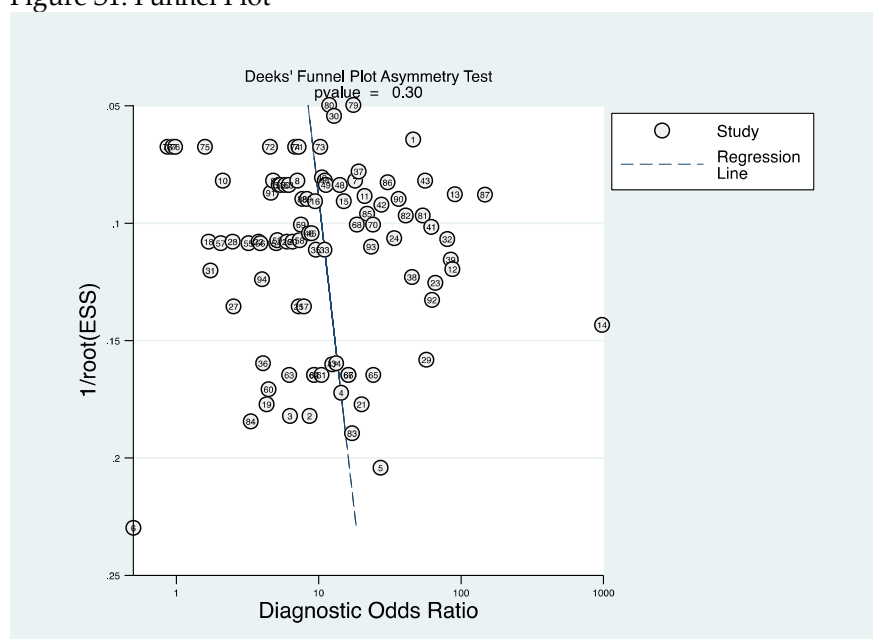

Supplement: s1 [file s1]
